# Supplementary material for: Identifying the DEAD: Development and Validation of a Patient-Level Model to Predict Death Status in Population-Level Claims Data
Source: PubMed Central journal article supplement — Drug Saf. 2019 May 3;42(11):1377–86. doi: 10.1007/s40264-019-00827-0 (PMC6834730; doi:10.1007/s40264-019-00827-0), 2019-05-03
Supplement: 40264_2019_827_MOESM3_ESM.pdf [file 40264_2019_827_MOESM3_ESM.pdf]

# Title: Identifying the DEAD: Development and Validation of a Patient-Level Model to Predict Death Status in Population-Level Claims

Journal: Drug Safety

Authors: Jenna M. Reps<sup>1</sup>, Peter R. Rijnbeek<sup>2</sup> and Patrick B. Ryan<sup>1</sup>

Affiliations: <sup>1</sup>Janssen Research and Development, Raritan, NJ; <sup>2</sup>Erasmus MC, Rotterdam, The Netherlands

Corresponding author: jreps@its.jnj.com

## Electronic Supplementary Material 3

### Characteristics of some incorrect predictions

There were 727 patients who did not have death recorded within 61 days of end of observation but had a predicted risk of 0.9 or greater. There were 2233 patients who had death recorded within 61 days of end of observation but had a predicted risk of 0.1 or lesser.

In the 727 patients who were assigned a high risk of death by the model 34 of these patients had a death record at some point in time. 15 out of the 34 occurred within 180 days and 19 out of the 34 occurred within 365 days.

The table below shows the covariates with the greatest difference in incidence between the 727 patients who did not have death recorded within 61 days of end of observation but had a predicted risk of 0.9 or greater (FPs) and the 2233 patients who had death recorded within 61 days of end of observation but had a predicted risk of 0.1 or lesser (FNs). The patients who the model predicted to be dead at the end of the observation were generally sicker patients who had inpatient and ER visits in the prior year.

| Covariate                                                                                                                                                                                                                | FNs incidence (N= 2233) | FPs incidence (N= 727) | incidence difference |
|--------------------------------------------------------------------------------------------------------------------------------------------------------------------------------------------------------------------------|-------------------------|------------------------|----------------------|
| procedure_occurrence during day -365 through 0 days relative to index: Radiologic examination, chest; single view, frontal                                                                                               | 0.212                   | 0.937                  | 0.724                |
| procedure_occurrence during day -365 through 0 days relative to index: Initial hospital care, per day, for the evaluation and management of a patient, which requires these 3 key components: A comprehensive history; A | 0.172                   | 0.821                  | 0.649                |

|                                                                                                                                                                                                                                                                                                                                        |       |       |       |
|----------------------------------------------------------------------------------------------------------------------------------------------------------------------------------------------------------------------------------------------------------------------------------------------------------------------------------------|-------|-------|-------|
| comprehensive examination; and Medical decision making of high complexity. Counseling and/or coordination of                                                                                                                                                                                                                           |       |       |       |
| procedure_occurrence during day -30 through 0 days relative to index: Radiologic examination, chest; single view, frontal                                                                                                                                                                                                              | 0.042 | 0.681 | 0.639 |
| procedure_occurrence during day -365 through 0 days relative to index: Subsequent hospital care, per day, for the evaluation and management of a patient, which requires at least 2 of these 3 key components: A detailed interval history; A detailed examination; Medical decision making of high complexity. Counseling and/or coor | 0.150 | 0.787 | 0.636 |
| procedure_occurrence during day -365 through 0 days relative to index: Subsequent hospital care, per day, for the evaluation and management of a patient, which requires at least 2 of these 3 key components: An expanded problem focused interval history; An expanded problem focused examination; Medical decision making of moder | 0.186 | 0.821 | 0.635 |
| observation during day -365 through 0 days relative to index: Ground mileage, per statute mile                                                                                                                                                                                                                                         | 0.188 | 0.809 | 0.621 |
| condition_era group during day -365 through 0 days relative to index: Heart disease                                                                                                                                                                                                                                                    | 0.319 | 0.930 | 0.611 |
| condition_era group during day -365 through 0 days relative to index: Cardiac arrhythmia                                                                                                                                                                                                                                               | 0.177 | 0.773 | 0.596 |
| measurement during day -365 through 0 days relative to index: Electrocardiogram, routine ECG with at least 12 leads; interpretation and report only                                                                                                                                                                                    | 0.234 | 0.827 | 0.593 |
| procedure_occurrence during day -365 through 0 days relative to index: Critical care, evaluation and management of the critically ill or critically injured patient; first 30-74 minutes                                                                                                                                               | 0.093 | 0.671 | 0.579 |
| visit_occurrence concept count during day -365 through 0 concept_count relative to index: Inpatient Visit                                                                                                                                                                                                                              | 0.236 | 0.813 | 0.576 |
| condition_era group during day -30 through 0 days relative to index: Heart disease                                                                                                                                                                                                                                                     | 0.097 | 0.659 | 0.562 |
| visit_occurrence concept count during day -30 through 0 concept_count relative to index: Inpatient Visit                                                                                                                                                                                                                               | 0.050 | 0.607 | 0.557 |
| procedure_occurrence during day -365 through 0 days relative to index: Emergency department visit for the evaluation and management of a patient, which requires these 3 key components within the constraints imposed by the urgency of the patient's clinical condition and/or mental status: A comprehensive history; A comprehensi | 0.218 | 0.765 | 0.547 |

|                                                                                                                                                                                                                                                                                                                                       |       |       |       |
|---------------------------------------------------------------------------------------------------------------------------------------------------------------------------------------------------------------------------------------------------------------------------------------------------------------------------------------|-------|-------|-------|
| condition_era group during day -365 through 0 days relative to index: Respiratory insufficiency                                                                                                                                                                                                                                       | 0.060 | 0.602 | 0.542 |
| condition_era group during day -365 through 0 days relative to index: Respiratory failure                                                                                                                                                                                                                                             | 0.056 | 0.591 | 0.536 |
| visit_occurrence concept count during day -365 through 0 concept_count relative to index: Emergency Room Visit                                                                                                                                                                                                                        | 0.386 | 0.922 | 0.535 |
| condition_era group during day -365 through 0 days relative to index: Kidney disease                                                                                                                                                                                                                                                  | 0.170 | 0.704 | 0.535 |
| procedure_occurrence during day -30 through 0 days relative to index: Subsequent hospital care, per day, for the evaluation and management of a patient, which requires at least 2 of these 3 key components: An expanded problem focused interval history; An expanded problem focused examination; Medical decision making of moder | 0.038 | 0.572 | 0.534 |
| observation during day -30 through 0 days relative to index: Ground mileage, per statute mile                                                                                                                                                                                                                                         | 0.053 | 0.576 | 0.523 |
| condition_era group during day -365 through 0 days relative to index: Pneumonitis                                                                                                                                                                                                                                                     | 0.090 | 0.611 | 0.521 |
| condition_era group during day -365 through 0 days relative to index: Renal impairment                                                                                                                                                                                                                                                | 0.123 | 0.642 | 0.519 |
| procedure_occurrence during day -30 through 0 days relative to index: Subsequent hospital care, per day, for the evaluation and management of a patient, which requires at least 2 of these 3 key components: A detailed interval history; A detailed examination; Medical decision making of high complexity. Counseling and/or coor | 0.034 | 0.547 | 0.514 |
| condition_era group during day -365 through 0 days relative to index: Acute respiratory failure                                                                                                                                                                                                                                       | 0.050 | 0.563 | 0.512 |
| condition_era group during day -365 through 0 days relative to index: Vascular disorder                                                                                                                                                                                                                                               | 0.318 | 0.831 | 0.512 |
| condition_occurrence during day -365 through 0 days relative to index: Acute respiratory failure                                                                                                                                                                                                                                      | 0.048 | 0.556 | 0.508 |
| condition_occurrence during day -365 through 0 days relative to index: Dyspnea                                                                                                                                                                                                                                                        | 0.159 | 0.667 | 0.508 |
| condition_era group during day -365 through 0 days relative to index: Inflammatory disorder of lower respiratory tract                                                                                                                                                                                                                | 0.174 | 0.681 | 0.507 |
| condition_era group during day -365 through 0 days relative to index: Dyspnea                                                                                                                                                                                                                                                         | 0.160 | 0.667 | 0.507 |
| condition_era group during day -365 through 0 days relative to index: Difficulty breathing                                                                                                                                                                                                                                            | 0.161 | 0.667 | 0.506 |
| condition_era group during day -365 through 0 days relative to index: Renal failure syndrome                                                                                                                                                                                                                                          | 0.089 | 0.589 | 0.500 |

|                                                                                                                                                                                                                                                                                                                                      |       |       |       |
|--------------------------------------------------------------------------------------------------------------------------------------------------------------------------------------------------------------------------------------------------------------------------------------------------------------------------------------|-------|-------|-------|
| condition_era group during day -365 through 0 days relative to index: Measurement finding below reference range                                                                                                                                                                                                                      | 0.195 | 0.686 | 0.491 |
| condition_era group during day -365 through 0 days relative to index: Pneumonia                                                                                                                                                                                                                                                      | 0.080 | 0.568 | 0.488 |
| condition_era group during day -365 through 0 days relative to index: Lung consolidation                                                                                                                                                                                                                                             | 0.080 | 0.568 | 0.488 |
| observation during day -365 through 0 days relative to index: Ambulance service, advanced life support, emergency transport, level 1 (als 1 - emergency)                                                                                                                                                                             | 0.126 | 0.612 | 0.486 |
| procedure_occurrence during day -30 through 0 days relative to index: Initial hospital care, per day, for the evaluation and management of a patient, which requires these 3 key components: A comprehensive history; A comprehensive examination; and Medical decision making of high complexity. Counseling and/or coordination of | 0.031 | 0.514 | 0.483 |
| condition_era group during day -365 through 0 days relative to index: Measurement finding outside reference range                                                                                                                                                                                                                    | 0.275 | 0.752 | 0.477 |
| procedure_occurrence during day -365 through 0 days relative to index: Echocardiography, transthoracic, real-time with image documentation (2D), includes M-mode recording, when performed, complete, with spectral Doppler echocardiography, and with color flow Doppler echocardiography                                           | 0.137 | 0.612 | 0.476 |
| condition_era group during day -365 through 0 days relative to index: Hemoglobin low                                                                                                                                                                                                                                                 | 0.185 | 0.660 | 0.475 |
| condition_era group during day -365 through 0 days relative to index: RBC count abnormal                                                                                                                                                                                                                                             | 0.185 | 0.660 | 0.475 |
| condition_era group during day -365 through 0 days relative to index: RBC count low                                                                                                                                                                                                                                                  | 0.185 | 0.660 | 0.475 |
| condition_era group during day -365 through 0 days relative to index: Hemoglobin level outside reference range                                                                                                                                                                                                                       | 0.185 | 0.660 | 0.475 |
| procedure_occurrence during day -30 through 0 days relative to index: Critical care, evaluation and management of the critically ill or critically injured patient; first 30-74 minutes                                                                                                                                              | 0.020 | 0.492 | 0.472 |
| condition_era group during day -365 through 0 days relative to index: Heart failure                                                                                                                                                                                                                                                  | 0.109 | 0.580 | 0.472 |
| condition_era group during day -365 through 0 days relative to index: Acute genitourinary disorder                                                                                                                                                                                                                                   | 0.064 | 0.534 | 0.470 |
| procedure_occurrence during day -365 through 0 days relative to index: Initial hospital care, per day, for the evaluation and management of a patient, which requires these 3 key components: A comprehensive history; A                                                                                                             | 0.118 | 0.587 | 0.470 |

|                                                                                                                                                          |       |       |       |
|----------------------------------------------------------------------------------------------------------------------------------------------------------|-------|-------|-------|
| comprehensive examination; and Medical decision making of moderate complexity. Counseling and/or coordination                                            |       |       |       |
| visit_occurrence concept count during day -30 through 0<br>concept_count relative to index: Emergency Room Visit                                         | 0.099 | 0.567 | 0.467 |
| condition_occurrence during day -365 through 0 days<br>relative to index: Acute renal failure syndrome                                                   | 0.054 | 0.516 | 0.462 |
| condition_era group during day -365 through 0 days relative<br>to index: Acute renal failure syndrome                                                    | 0.054 | 0.516 | 0.462 |
| condition_era group during day -365 through 0 days relative<br>to index: Acute renal impairment                                                          | 0.054 | 0.516 | 0.462 |
| condition_era group during day -365 through 0 days relative<br>to index: Acute nephropathy                                                               | 0.056 | 0.517 | 0.461 |
| condition_era group during day -365 through 0 days relative<br>to index: Acute respiratory disease                                                       | 0.223 | 0.680 | 0.457 |
| measurement during day -30 through 0 days relative to<br>index: Electrocardiogram, routine ECG with at least 12<br>leads; interpretation and report only | 0.044 | 0.501 | 0.456 |
| condition_occurrence during day -365 through 0 days<br>relative to index: Pneumonia                                                                      | 0.074 | 0.530 | 0.456 |
| condition_era group during day -365 through 0 days relative<br>to index: Congestive heart failure                                                        | 0.097 | 0.546 | 0.449 |
| condition_era group during day -365 through 0 days relative<br>to index: Lesion of lung                                                                  | 0.104 | 0.550 | 0.446 |
| condition_occurrence during day -365 through 0 days<br>relative to index: Congestive heart failure                                                       | 0.096 | 0.538 | 0.442 |
| condition_era group during day -365 through 0 days relative<br>to index: Inflammatory disorder of the respiratory tract                                  | 0.268 | 0.708 | 0.440 |
| condition_era group during day -365 through 0 days relative<br>to index: Inflammatory disorder of the respiratory system                                 | 0.272 | 0.711 | 0.439 |
| condition_era group during day -365 through 0 days relative<br>to index: Structural disorder of heart                                                    | 0.195 | 0.631 | 0.437 |
| condition_era group during day -30 through 0 days relative<br>to index: Cardiac arrhythmia                                                               | 0.056 | 0.492 | 0.436 |
| procedure_occurrence during day -365 through 0 days<br>relative to index: Computed tomography, head or brain;<br>without contrast material               | 0.124 | 0.558 | 0.435 |
| condition_era group during day -365 through 0 days relative<br>to index: Pleural effusion                                                                | 0.064 | 0.491 | 0.427 |
| condition_era group during day -365 through 0 days relative<br>to index: Acute disease of cardiovascular system                                          | 0.108 | 0.535 | 0.427 |
| condition_occurrence during day -365 through 0 days<br>relative to index: Pleural effusion                                                               | 0.063 | 0.486 | 0.422 |

|                                                                                                                                                                                                                                                                                                                                        |       |       |       |
|----------------------------------------------------------------------------------------------------------------------------------------------------------------------------------------------------------------------------------------------------------------------------------------------------------------------------------------|-------|-------|-------|
| condition_occurrence during day -365 through 0 days relative to index: Respiratory symptom                                                                                                                                                                                                                                             | 0.110 | 0.530 | 0.420 |
| condition_era group during day -365 through 0 days relative to index: Respiratory symptom                                                                                                                                                                                                                                              | 0.110 | 0.530 | 0.420 |
| condition_era group during day -365 through 0 days relative to index: Chronic disease of respiratory system                                                                                                                                                                                                                            | 0.184 | 0.602 | 0.418 |
| condition_era group during day -365 through 0 days relative to index: Pain of truncal structure                                                                                                                                                                                                                                        | 0.343 | 0.757 | 0.413 |
| procedure_occurrence during day -365 through 0 days relative to index: Subsequent hospital care, per day, for the evaluation and management of a patient, which requires at least 2 of these 3 key components: A problem focused interval history; A problem focused examination; Medical decision making that is straightforward or o | 0.099 | 0.510 | 0.411 |
| condition_occurrence during day -365 through 0 days relative to index: Essential hypertension                                                                                                                                                                                                                                          | 0.368 | 0.774 | 0.407 |
| condition_occurrence during day -365 through 0 days relative to index: Anemia                                                                                                                                                                                                                                                          | 0.146 | 0.552 | 0.406 |
| condition_era group during day -365 through 0 days relative to index: Supraventricular arrhythmia                                                                                                                                                                                                                                      | 0.086 | 0.486 | 0.400 |
| condition_era group during day -365 through 0 days relative to index: Pain                                                                                                                                                                                                                                                             | 0.496 | 0.895 | 0.399 |
| condition_era group during day -365 through 0 days relative to index: Inflammation of specific body organs                                                                                                                                                                                                                             | 0.442 | 0.840 | 0.398 |
| condition_era group during day -365 through 0 days relative to index: Peripheral vascular disease                                                                                                                                                                                                                                      | 0.183 | 0.580 | 0.398 |
| condition_era group during day -365 through 0 days relative to index: Radiology result abnormal                                                                                                                                                                                                                                        | 0.112 | 0.506 | 0.395 |
| condition_era group during day -365 through 0 days relative to index: Imaging result abnormal                                                                                                                                                                                                                                          | 0.112 | 0.506 | 0.395 |
| condition_era group during day -365 through 0 days relative to index: Pain finding at anatomical site                                                                                                                                                                                                                                  | 0.491 | 0.882 | 0.390 |
| condition_era group during day -365 through 0 days relative to index: Soft tissue lesion                                                                                                                                                                                                                                               | 0.322 | 0.710 | 0.387 |
| condition_era group during day -365 through 0 days relative to index: Atrial arrhythmia                                                                                                                                                                                                                                                | 0.082 | 0.466 | 0.384 |
| procedure_occurrence during day -365 through 0 days relative to index: Hospital discharge day management; more than 30 minutes                                                                                                                                                                                                         | 0.118 | 0.502 | 0.384 |
| condition_era group during day -30 through 0 days relative to index: Respiratory insufficiency                                                                                                                                                                                                                                         | 0.019 | 0.399 | 0.380 |
| condition_era group during day -30 through 0 days relative to index: Respiratory failure                                                                                                                                                                                                                                               | 0.017 | 0.396 | 0.379 |

|                                                                                                                                                                                   |       |       |       |
|-----------------------------------------------------------------------------------------------------------------------------------------------------------------------------------|-------|-------|-------|
| condition_era group during day -365 through 0 days relative to index: Essential hypertension                                                                                      | 0.458 | 0.836 | 0.379 |
| condition_era group during day -365 through 0 days relative to index: Hypertensive disorder                                                                                       | 0.458 | 0.836 | 0.378 |
| condition_era group during day -365 through 0 days relative to index: Inflammation of specific body systems                                                                       | 0.476 | 0.849 | 0.373 |
| condition_era group during day -365 through 0 days relative to index: Tracheobronchial disorder                                                                                   | 0.203 | 0.575 | 0.372 |
| measurement during day -365 through 0 days relative to index: Blood count; complete (CBC), automated (Hgb, Hct, RBC, WBC and platelet count) and automated differential WBC count | 0.358 | 0.729 | 0.371 |
| condition_era group during day -365 through 0 days relative to index: Fibrillation                                                                                                | 0.074 | 0.444 | 0.370 |
| condition_occurrence during day -365 through 0 days relative to index: Abnormal findings on diagnostic imaging of lung                                                            | 0.077 | 0.447 | 0.370 |
| condition_era group during day -365 through 0 days relative to index: Abnormal findings on diagnostic imaging of lung                                                             | 0.077 | 0.447 | 0.370 |
| condition_era group during day -30 through 0 days relative to index: Acute respiratory disease                                                                                    | 0.035 | 0.399 | 0.364 |
| condition_era group during day -365 through 0 days relative to index: Arteriosclerotic vascular disease                                                                           | 0.167 | 0.531 | 0.363 |
| condition_occurrence during day -365 through 0 days relative to index: Atrial fibrillation                                                                                        | 0.072 | 0.433 | 0.362 |
| condition_era group during day -365 through 0 days relative to index: Atrial fibrillation                                                                                         | 0.072 | 0.433 | 0.362 |
| procedure_occurrence during day -365 through 0 days relative to index: Radiologic examination, chest, 2 views, frontal and lateral                                                | 0.233 | 0.591 | 0.359 |
| condition_era group during day -30 through 0 days relative to index: Inflammation of specific body systems                                                                        | 0.098 | 0.453 | 0.354 |
| condition_era group during day -30 through 0 days relative to index: Acute respiratory failure                                                                                    | 0.014 | 0.367 | 0.353 |
| condition_era group during day -365 through 0 days relative to index: Chest pain                                                                                                  | 0.176 | 0.528 | 0.352 |
| condition_era group during day -365 through 0 days relative to index: Bronchiolar disease                                                                                         | 0.133 | 0.484 | 0.351 |
| condition_era group during day -30 through 0 days relative to index: Inflammation of specific body organs                                                                         | 0.088 | 0.439 | 0.351 |
| condition_era group during day -365 through 0 days relative to index: Chronic obstructive lung disease                                                                            | 0.133 | 0.483 | 0.350 |

|                                                                                                    |       |       |       |
|----------------------------------------------------------------------------------------------------|-------|-------|-------|
| condition_era group during day -365 through 0 days relative to index: Malignant neoplastic disease | 0.148 | 0.498 | 0.350 |
|----------------------------------------------------------------------------------------------------|-------|-------|-------|
