# Supplementary material for: Identifying the DEAD: Development and Validation of a Patient-Level Model to Predict Death Status in Population-Level Claims Data
Source: PubMed Central journal article supplement — Drug Saf. 2019 May 3;42(11):1377–86. doi: 10.1007/s40264-019-00827-0 (PMC6834730; doi:10.1007/s40264-019-00827-0), 2019-05-03
Supplement: 40264_2019_827_MOESM4_ESM.pdf [file 40264_2019_827_MOESM4_ESM.pdf]

**Title:** Identifying the DEAD: Development and Validation of a Patient-Level Model to Predict Death Status in Population-Level Claims

**Journal:** Drug Safety

**Authors:** Jenna M. Reps<sup>1</sup>, Peter R. Rijnbeek<sup>2</sup> and Patrick B. Ryan<sup>1</sup>

**Affiliations:** <sup>1</sup>Janssen Research and Development, Raritan, NJ; <sup>2</sup>Erasmus MC, Rotterdam, The Netherlands

**Corresponding author:** jreps@its.jnj.com

**Electronic Supplementary Material 4**

**Full table 1**

| Characteristic                           | Development Dataset  |                  | Validation Datasets |                           |                 |                           |                 |                           |                 |                           |
|------------------------------------------|----------------------|------------------|---------------------|---------------------------|-----------------|---------------------------|-----------------|---------------------------|-----------------|---------------------------|
|                                          | OPTUM DOD test/train |                  | OPTUM validation    |                           | CCAЕ            |                           | MDCD            |                           | MDCR            |                           |
|                                          | Non dead             | Dead (all death) | Non dead            | Dead (death at discharge) | Non dead        | Dead (death at discharge) | Non dead        | Dead (death at discharge) | Non dead        | Dead (death at discharge) |
|                                          | % (n = 975,469)      | % (n = 24,531)   | % (n = 389,080)     | % (n = 996)               | % (n = 409,238) | % (n = 1,000)             | % (n = 289,870) | % (n = 989)               | % (n = 456,399) | % (n = 960)               |
| Gender: female                           | 50.6                 | 49.8             | 50.1                | 42.3                      | 51.7            | 45                        | 60.5            | 63.8                      | 51.9            | 47.2                      |
| Medical history: General                 |                      |                  |                     |                           |                 |                           |                 |                           |                 |                           |
| Acute respiratory disease                | 26.2                 | 48.0             | 19.6                | 40.8                      | 21.6            | 58.3                      | 25.3            | 50.2                      | 15.2            | 57                        |
| Attention deficit hyperactivity disorder | 2.4                  | 0.3              | 1.3                 | 0.5                       | 1.5             | 0.8                       | 2.5             | 0.9                       | 0.1             | 0                         |
| Chronic liver disease                    | 1                    | 4.4              | 0.5                 | 3                         | 0.5             | 9.2                       | 0.4             | 6.1                       | 0.7             | 1.9                       |
| Chronic obstructive lung disease         | 2.1                  | 36.5             | 1.1                 | 29.8                      | 0.6             | 22.8                      | 1.6             | 38.4                      | 7.2             | 38.2                      |
| Crohn's disease                          | 0.3                  | 0.7              | 0.2                 | 0.6                       | 0.2             | 1.2                       | 0.1             | 0.4                       | 0.3             | 0.8                       |

|                                         |      |      |      |      |      |      |      |      |      |      |
|-----------------------------------------|------|------|------|------|------|------|------|------|------|------|
| Dementia                                | 0.8  | 23.7 | 0.3  | 14.8 | 0.1  | 1.8  | 0.5  | 31.2 | 2.2  | 16.7 |
| Depressive disorder                     | 7.1  | 23.1 | 4.4  | 20.1 | 4.1  | 17.4 | 4.9  | 32.6 | 4.8  | 14.9 |
| Diabetes mellitus                       | 7.1  | 36.3 | 3.9  | 39.2 | 3.9  | 26.7 | 3.3  | 39.7 | 18.6 | 30.1 |
| Gastroesophageal reflux disease         | 5.7  | 22.4 | 3.3  | 20   | 3.2  | 17.1 | 3.6  | 24   | 7.9  | 13.7 |
| Gastrointestinal hemorrhage             | 1.4  | 13.5 | 0.9  | 10   | 0.8  | 14.9 | 0.6  | 13.1 | 2.5  | 13.9 |
| Human immunodeficiency virus infection  | 0.2  | 0.4  | 0.1  | 0.4  | 0.1  | 1    | 0.2  | 2.1  | 0.1  | 0.1  |
| Hyperlipidemia                          | 19.1 | 50.9 | 10.5 | 53.5 | 10.3 | 30.7 | 3.7  | 33.6 | 34.4 | 31.5 |
| Hypertensive disorder                   | 18.3 | 76.0 | 10   | 73.1 | 10   | 50.4 | 6.9  | 70.8 | 44.9 | 64.5 |
| Lesion of liver                         | 0.4  | 13.1 | 0.1  | 4.7  | 0.1  | 27.6 | 0.2  | 10.4 | 0.5  | 6.8  |
| Obesity                                 | 4.1  | 7.6  | 2.2  | 11.4 | 2.2  | 9.9  | 2.9  | 10.9 | 2.6  | 4    |
| Osteoarthritis                          | 8.0  | 34.9 | 4.3  | 35.3 | 4.2  | 18   | 2.7  | 30.1 | 19.3 | 27.4 |
| Pneumonia                               | 2.0  | 39.2 | 1.2  | 25.6 | 1.1  | 36   | 2    | 38.7 | 3.3  | 44.7 |
| Psoriasis                               | 0.7  | 0.9  | 0.4  | 1    | 0.4  | 1.2  | 0.1  | 0.7  | 0.8  | 0.9  |
| Renal impairment                        | 2.0  | 46.6 | 0.8  | 34.2 | 0.4  | 35.9 | 1    | 43.5 | 5.3  | 44.7 |
| Rheumatoid arthritis                    | 0.7  | 3.4  | 0.4  | 1.9  | 0.3  | 2.6  | 0.2  | 1.8  | 1.5  | 2.6  |
| Schizophrenia                           | 0.1  | 0.8  | 0.1  | 0.8  | 0    | 0.3  | 0.6  | 5.9  | 0.1  | 0.1  |
| Ulcerative colitis                      | 0.2  | 1.0  | 0.1  | 0.7  | 0.2  | 1.5  | 0    | 1    | 0.3  | 0.8  |
| Urinary tract infectious disease        | 6.1  | 37.0 | 3.9  | 28.2 | 3.7  | 19.8 | 4.8  | 36.3 | 7.3  | 30.4 |
| Viral hepatitis C                       | 0.3  | 1.5  | 0.2  | 1    | 0.2  | 3.5  | 0.4  | 4.4  | 0.2  | 0.4  |
| Visual system disorder                  | 16.1 | 39.6 | 10.8 | 35.3 | 9.3  | 21.7 | 13.6 | 34   | 37.6 | 43.4 |
| Medical history: Cardiovascular disease |      |      |      |      |      |      |      |      |      |      |
| Atrial fibrillation                     | 1.4  | 31.8 | 0.6  | 25.4 | 0.3  | 17   | 0.4  | 23   | 6.9  | 37.8 |
| Cerebrovascular disease                 | 1.4  | 25.2 | 0.6  | 19   | 0.4  | 13.4 | 0.7  | 20.9 | 4.3  | 28.1 |
| Coronary arteriosclerosis               | 3.1  | 35.4 | 1.6  | 36.4 | 1.1  | 19.8 | 1.1  | 27.2 | 14.3 | 41.9 |
| Heart disease                           | 8.3  | 75.9 | 4.6  | 79.3 | 4    | 71.1 | 3.9  | 76.1 | 29.4 | 87.4 |
| Heart failure                           | 1.4  | 42.0 | 0.7  | 34.4 | 0.3  | 23.9 | 1    | 41.4 | 5.2  | 52   |
| Ischemic heart disease                  | 1.8  | 27.7 | 1.1  | 27   | 0.7  | 18.8 | 0.7  | 20.3 | 6.6  | 35.6 |
| Peripheral vascular disease             | 3.9  | 48.2 | 1.9  | 38.5 | 1.5  | 30   | 1.5  | 38.5 | 13.7 | 44.9 |

|                                               |      |      |      |      |      |      |      |      |      |      |
|-----------------------------------------------|------|------|------|------|------|------|------|------|------|------|
| Pulmonary embolism                            | 0.2  | 5.7  | 0.1  | 3.3  | 0.1  | 7.4  | 0.1  | 4.9  | 0.5  | 5    |
| Venous thrombosis                             | 0.9  | 13.2 | 0.5  | 8.2  | 0.4  | 16.6 | 0.4  | 10.4 | 2.2  | 13.1 |
| Medical history: Neoplasms                    |      |      |      |      |      |      |      |      |      |      |
| Hematologic neoplasm                          | 0.5  | 11.0 | 0.2  | 4.7  | 0.2  | 20.5 | 0.2  | 4.9  | 1.1  | 5.7  |
| Malignant lymphoma                            | 0.2  | 2.8  | 0.1  | 0.7  | 0.1  | 4.8  | 0.1  | 1.1  | 0.6  | 1.7  |
| Malignant neoplasm of anorectum               | 0.1  | 2.0  | 0    | 0.9  | 0    | 3.7  | 0    | 1.1  | 0.3  | 1.4  |
| Malignant neoplastic disease                  | 3.7  | 37.5 | 1.8  | 20.3 | 1.7  | 53.5 | 0.8  | 18.9 | 13.9 | 31.3 |
| Malignant tumor of breast                     | 0.6  | 4.0  | 0.3  | 1.8  | 0.4  | 8.9  | 0.2  | 2.5  | 2.3  | 3    |
| Malignant tumor of colon                      | 0.2  | 4.1  | 0.1  | 2    | 0.1  | 4.8  | 0.1  | 2    | 0.7  | 3.5  |
| Malignant tumor of lung                       | 0.2  | 10.2 | 0.1  | 5.2  | 0    | 19.2 | 0    | 4.6  | 0.4  | 5.6  |
| Malignant tumor of urinary bladder            | 0.1  | 2.0  | 0.1  | 1.1  | 0    | 1.7  | 0    | 0.7  | 0.7  | 2.1  |
| Primary malignant neoplasm of prostate        | 0.5  | 5.1  | 0.2  | 2.8  | 0.1  | 2    | 0.1  | 1    | 3    | 5.8  |
| Medication use                                |      |      |      |      |      |      |      |      |      |      |
| Agents acting on the renin-angiotensin system | 11.6 | 41.4 | 6.2  | 40.2 | 7.3  | 35.1 | 2.5  | 14   | 38.5 | 46.2 |
| Antibacterials for systemic use               | 43.7 | 64.1 | 30.7 | 56.3 | 36.4 | 72.3 | 34.5 | 32.4 | 43.2 | 66   |
| Antidepressants                               | 13.0 | 35.2 | 8.2  | 29   | 9.6  | 34.9 | 5.9  | 16.1 | 16.8 | 31.1 |
| Antiepileptics                                | 5.4  | 19.1 | 2.9  | 18.9 | 3.5  | 23.1 | 3.3  | 16.4 | 8.9  | 15.9 |
| Antiinflammatory and antirheumatic products   | 13.9 | 15.9 | 8.5  | 18.6 | 11.2 | 23   | 12.3 | 13   | 19.3 | 16.4 |
| Antineoplastic agents                         | 1.7  | 13.3 | 0.9  | 7    | 1.1  | 32.6 | 0.5  | 5.8  | 3    | 8    |
| Antipsoriatics                                | 0.4  | 1.5  | 0.3  | 1    | 0.3  | 1.4  | 0.1  | 0.5  | 0.6  | 1.3  |
| Antithrombotic agents                         | 3.0  | 32.6 | 1.5  | 28.7 | 1.5  | 35.5 | 1.4  | 21.1 | 14.7 | 39.8 |
| Beta blocking agents                          | 7.2  | 43.3 | 4    | 39.8 | 4.3  | 34.5 | 1.9  | 15.1 | 29.3 | 50.3 |

|                                                       |       |       |       |       |       |       |       |       |       |       |
|-------------------------------------------------------|-------|-------|-------|-------|-------|-------|-------|-------|-------|-------|
| Calcium channel blockers                              | 5.1   | 27.5  | 2.7   | 22.8  | 2.8   | 21.5  | 1.4   | 11.5  | 20.6  | 29.2  |
| Diuretics                                             | 9.0   | 47.8  | 5.1   | 44.7  | 5.9   | 43.1  | 2.5   | 17    | 32.1  | 58.3  |
| Drugs for acid related disorders                      | 7.7   | 36.8  | 5.2   | 33.5  | 6.7   | 43.9  | 5.3   | 23.8  | 21.8  | 37.2  |
| Drugs for obstructive airway diseases                 | 14.8  | 31.9  | 8.9   | 27.3  | 11.5  | 31.8  | 13.1  | 20.4  | 18    | 32.5  |
| Drugs used in diabetes                                | 5.5   | 23.4  | 3     | 23.5  | 3.3   | 20.4  | 1.8   | 10.7  | 15.8  | 24    |
| Immunosuppressants                                    | 1.1   | 3.3   | 0.6   | 2.2   | 0.8   | 7.7   | 0.3   | 1.9   | 2.5   | 3.7   |
| Lipid modifying agents                                | 12.5  | 39.0  | 6.4   | 36.9  | 7.5   | 29.8  | 2.2   | 12    | 43.5  | 46.3  |
| Opioids                                               | 9.7   | 38.4  | 6.4   | 34    | 8.1   | 53.3  | 8.3   | 26.6  | 16    | 31.3  |
| Psycholeptics                                         | 12.3  | 38.4  | 7.3   | 33.6  | 9.4   | 57.6  | 7.5   | 38.3  | 20.5  | 38.7  |
| Psychostimulants, agents used for adhd and nootropics | 3.8   | 1.6   | 1.9   | 2     | 2.7   | 4.2   | 2.8   | 1.5   | 1.1   | 1.5   |
|                                                       |       |       |       |       |       |       |       |       |       |       |
| Characteristic                                        | Value |
| Charlson comorbidity index                            |       |       |       |       |       |       |       |       |       |       |
| Mean                                                  | 0.9   | 7.5   | 0     | 6     | 0     | 7     | 0     | 6     | 2     | 7     |
| Age in years                                          |       |       |       |       |       |       |       |       |       |       |
| Mean                                                  | 37.4  | 75.3  | 33    | 70    | 32    | 54    | 20    | 70    | 73    | 82    |
